# Supplementary material for: On the Heat Stability of Amyloid-Based Biological Activity: Insights from Thermal Degradation of Insulin Fibrils
Source: PubMed Central journal article supplement (PMC3897677; doi:10.1371/journal.pone.0086320), 2014-01-21
Supplement: pone.0086320.s001.pdf [file pone.0086320.s001.pdf]

*On the heat stability of amyloid-based biological activity: insights from thermal degradation of insulin fibrils.*

*(Thermal degradation of insulin fibrils)*

Weronika Surmacz-Chwedoruk, Iwona Malka, Łukasz Bożycki, Hanna Nieznańska, Wojciech Dzwolak

## Supporting Information

Repeated TGA/DSC scans of human insulin amyloid samples: demonstration of the high degree of reproducibility of the data in Figure 2.

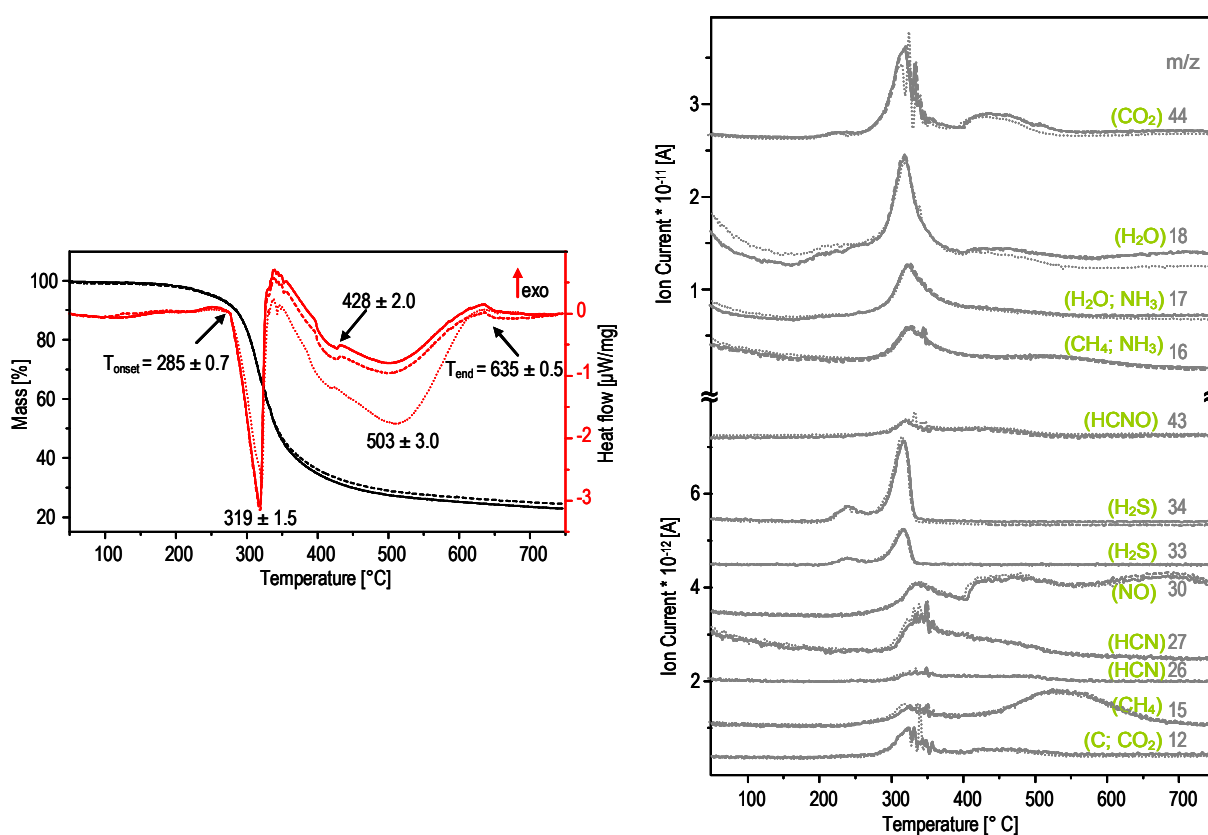

**Figure S1.**

Figure S1 shows several overlapping TGA and DSC traces (left panel: black and red lines, respectively) and corresponding MS profiles of released gases (right panel) for repeated experiments depicted in Figure 2 of the main article.
